# Supplementary material for: A novel direct co-culture assay analyzed by multicolor flow cytometry reveals context- and cell type-specific immunomodulatory effects of equine mesenchymal stromal cells
Source: PubMed Central journal article supplement (PMC6597077; doi:10.1371/journal.pone.0218949), 2019-06-27
Supplement: pone.0218949.s001.pdf [file pone.0218949.s001.pdf]

**S1 Table:****Cytokine production and CD25/FoxP3 expression in leukocyte subpopulations**

Data are presented as median (minimum – maximum) percentage of cells positive for the respective cytokine or CD25/FoxP3. When designated as not assessed (n.a.), reliable gating and analysis of the respective cell population was not possible due to degranulation or surface antigen loss.

|               |                      | <b>Leukocytes<br/>alone,<br/>non-stim</b> | <b>Leukocytes<br/>alone,<br/>ConA</b> | <b>Leukocytes<br/>alone,<br/>PMA/I</b> | <b>Co-<br/>culture,<br/>non-stim</b> | <b>Co-<br/>culture,<br/>ConA</b> | <b>Co-<br/>culture,<br/>PMA/I</b> |
|---------------|----------------------|-------------------------------------------|---------------------------------------|----------------------------------------|--------------------------------------|----------------------------------|-----------------------------------|
| IFN- $\gamma$ | T helper cells       | 1.9                                       | 2.4                                   | 15.6                                   | 0.7<br>(0.3-1.7)                     | 0.6<br>(0.2-1.8)                 | 15.8<br>(11.3-<br>25.1)           |
|               | Cytotoxic T<br>cells | 1.1                                       | 1.1                                   | 18.8                                   | 0.8<br>(0.3-1.8)                     | 1.3<br>(0.5-1.7)                 | 16.8<br>(14.6-<br>27.2)           |
|               | B cells              | 6.0                                       | 2.2                                   | 5.7                                    | 1.7<br>(0.7-3.7)                     | 0.9<br>(0.5-1.6)                 | 3.4<br>(1.7-10.9)                 |
|               | Granulocytes         | 4.1                                       | 7.3                                   | n.a.                                   | 1.3<br>(0.6-18.7)                    | 2.2<br>(0.5-16.5)                | n.a.                              |
|               | Monocytes            | 25.0                                      | 41.2                                  | n.a.                                   | 26.4<br>(16.1-<br>35.9)              | 9.1<br>(4.6-14.0)                | n.a.                              |

|               |                   |      |      |      |                     |                     |                     |
|---------------|-------------------|------|------|------|---------------------|---------------------|---------------------|
| TNF- $\alpha$ | T cells           | 0.0  | 0.1  | 0.2  | 0.1<br>(0.0-0.4)    | 0.1<br>(0.1-1.3)    | 0.1<br>(0.0-0.1)    |
|               | B cells           | 0.4  | 0.7  | n.a. | 0.4<br>(0.2-0.5)    | 0.3<br>(0.2-0.6)    | 0.3<br>(0.2-0.4)    |
|               | Granulocytes      | 0.4  | 0.6  | 1.9  | 0.4<br>(0.2-1.2)    | 0.4<br>(0.2-1.6)    | n.a.                |
|               | Monocytes         | 0.5  | 1.8  | n.a. | 0.2<br>(0.1-3.0)    | 0.2<br>(0.0-2.5)    | 1.1<br>(0.0-5.1)    |
| IL-1          | Lymphocytes       | 0.3  | 0.6  | 1.2  | 0.2<br>(0.1-1.1)    | 0.3<br>(0.2-0.6)    | 1.4<br>(0.1-2.7)    |
|               | Granulocytes      | 6.0  | 13.1 | 20.0 | 2.1<br>(0.8-6.4)    | 2.8<br>(0.5-5.2)    | 24.8<br>(16.8-47.0) |
|               | Monocytes         | 4.8  | 18.0 | n.a. | 26.8<br>(21.5-35.9) | 36.2<br>(20.8-43.2) | 45.5<br>(26.8-50.0) |
| IL-10         | T helper cells    | 6.1  | 9.8  | 25.8 | 4.2<br>(3.0-9.8)    | 5.8<br>(2.9-14.7)   | 22.0<br>(15.5-24.6) |
|               | Cytotoxic T cells | 11.6 | 17.0 | 25.7 | 5.1<br>(4.0-11.7)   | 10.3<br>(5.3-24.1)  | 24.3<br>(9.8-31.4)  |

|                |              |      |      |      |                         |                   |                    |
|----------------|--------------|------|------|------|-------------------------|-------------------|--------------------|
|                | B cells      | 19.1 | 12.5 | 11.4 | 11.4<br>(9.6-16.5)      | 8.5<br>(4.6-14.5) | 4.3<br>(3.8-5.4)   |
|                | Granulocytes | 5.6  | 6.9  | n.a. | 0.3<br>(0.2-0.6)        | 0.6<br>(0.3-2.9)  | n.a.               |
|                | Monocytes    | 62.8 | 43.7 | n.a. | 19.7<br>(16.5-<br>22.0) | 7.8<br>(1.3-5.6)  | n.a.               |
| CD25/<br>FoxP3 | CD4+ cells   | 0.5  | 2.1  | 5.4  | 0.6<br>(0.2-1.0)        | 1.0<br>(0.4-1.9)  | 14.9<br>(4.2-45.1) |
