# Supplementary material for: A novel direct co-culture assay analyzed by multicolor flow cytometry reveals context- and cell type-specific immunomodulatory effects of equine mesenchymal stromal cells
Source: PubMed Central journal article supplement (PMC6597077; doi:10.1371/journal.pone.0218949), 2019-06-27
Supplement: pone.0218949.s002.pdf [file pone.0218949.s002.pdf]

**S2 Table:****Primary antibodies, isotype controls and secondary antibodies**

| <b>Primary antibodies</b>      |                    |       |         |                  |            |                                                                   |          |
|--------------------------------|--------------------|-------|---------|------------------|------------|-------------------------------------------------------------------|----------|
| <b>Antigen</b>                 | Conjugate          | Host  | Isotype | Clone            | Reactivity | Supplier                                                          | Dilution |
| <b>CD3</b>                     | FITC               | Rat   | IgG1    | CD3-12           | Human      | Bio-Rad AbD Serotec,<br>Puchheim, Germany                         | 1:50     |
| <b>CD4</b>                     | FITC               | Mouse | IgG1    | CVS4             | Horse      | Bio-Rad AbD Serotec,<br>Puchheim, Germany                         | 1:100    |
| <b>CD8</b>                     | PE<br>unconjugated | Mouse | IgG2a   | CVS21            | Horse      | Bio-Rad AbD Serotec,<br>Puchheim, Germany                         | 1:10     |
| <b>CD14</b>                    | APC                | Mouse | IgG1    | 134620           | Human      | R&D Systems,<br>Wiesbaden, Germany                                | 1:50     |
| <b>CD25</b>                    | Biotinylated       | Mouse | IgG1    | Not<br>available | Horse      | Dr Bettina Wagner,<br>Cornell University,<br>Ithaca, NY, USA [40] | 1:50     |
| <b>FoxP3</b>                   | PerCP-Cy5.5        | Rat   | IgG2a   | FJK-16s          | Mouse/ rat | Thermo Fisher<br>Scientific, Darmstadt,<br>Germany                | 1:100    |
| <b>IFN-<math>\gamma</math></b> | Alexa Fluor<br>647 | Mouse | IgG1    | CC302            | Bovine     | Bio-Rad AbD Serotec,<br>Puchheim, Germany                         | 1:100    |
| <b>IL-1</b>                    | unconjugated       | Mouse | IgG1    | 608714           | Horse      | R&D Systems,<br>Wiesbaden, Germany                                | 1:100    |
| <b>IL-10</b>                   | APC                | Mouse | IgG1    | CC320            | Horse      | Bio-Techne,<br>Wiesbaden-<br>Nordenstadt, Germany                 | 1:400    |

|                                         |                    |       |                   |               |                                                    |                                           |       |
|-----------------------------------------|--------------------|-------|-------------------|---------------|----------------------------------------------------|-------------------------------------------|-------|
| <b>MAC</b>                              | unconjugated       | Mouse | IgG1              | MAC387        | Human                                              | Bio-Rad AbD Serotec,<br>Puchheim, Germany | 1:100 |
| <b>TNF-<math>\alpha</math></b>          | unconjugated       | Mouse | IgG2b             | CC327         | Bovine                                             | Bio-Rad AbD Serotec,<br>Puchheim, Germany | 1:50  |
| <b>Isotype controls (IC)</b>            |                    |       |                   |               |                                                    |                                           |       |
| <b>Corresponding primary antibodies</b> | Conjugate          | Host  | Isotype           | Clone         | Supplier                                           | Dilution                                  |       |
| <b>Anti-CD3</b>                         | FITC               | Rat   | IgG1              | Not available | Bio-Rad Laboratories,<br>Munich, Germany           | 1:50                                      |       |
| <b>Anti-CD4</b>                         | FITC               | Mouse | IgG1              | MOPC-21       | BioLegend, Koblenz,<br>Germany                     | 1:100                                     |       |
| <b>Anti-CD8</b>                         | Alexa 700          | Mouse | IgG2a             | MOPC-173      | BioLegend, Koblenz,<br>Germany                     | 1:100                                     |       |
| <b>Anti-CD14</b><br><b>Anti-IL-10</b>   | APC                | Mouse | IgG1              | MOPC-21       | BioLegend, Koblenz,<br>Germany                     | 1:50<br>1:400                             |       |
| <b>Anti-CD25</b>                        | biotinylated       | Goat  | Polyclonal<br>IgG | Not available | R&D Systems,<br>Wiesbaden, Germany                 | 1:50                                      |       |
| <b>Anti-FoxP3</b>                       | PerCP-Cy5.5        | Rat   | IgG2a             | eBR2a         | Thermo Fisher<br>Scientific, Darmstadt,<br>Germany | 1:100                                     |       |
| <b>Anti-IFN-<math>\gamma</math></b>     | Alexa Fluor<br>647 | Mouse | IgG1              | MOPC-21       | BioLegend, Koblenz,<br>Germany                     | 1:100                                     |       |
| <b>Anti-IL-1</b>                        | unconjugate<br>d   | Mouse | IgG1              | MG1-45        | BioLegend, Koblenz,<br>Germany                     | 1:100                                     |       |

|                                                       |                    |                                   |              |                                                   |                                    |       |
|-------------------------------------------------------|--------------------|-----------------------------------|--------------|---------------------------------------------------|------------------------------------|-------|
| <b>Anti-MAC</b>                                       | Alexa Fluor<br>700 | Mouse                             | IgG1         | 11711                                             | R&D Systems,<br>Wiesbaden, Germany | 1:100 |
| <b>Secondary antibodies</b>                           |                    |                                   |              |                                                   |                                    |       |
| <b>Target primary<br/>antibodies</b>                  | Conjugate          | Host                              | Reactivity   | Supplier                                          | Dilution                           |       |
| <b>Anti-CD8<br/>Anti-MAC</b>                          | Alexa Fluor 700    | Goat IgG<br>(H+L)                 | Mouse        | Thermo Fisher<br>Scientific, Damstadt,<br>Germany | 1:200                              |       |
| <b>Anti-CD25<br/>IC biotinylated<br/>goat IgG</b>     | BV605              | none                              | Streptavidin | BioLegend, Koblenz,<br>Germany                    | 1:50                               |       |
| <b>Anti-IL-1<br/>Isotype control<br/>mouse IgG1</b>   | Texas Red          | Goat IgG                          | Mouse        | Bio-Rad AbD Serotec,<br>Puchheim, Germany         | 1:500                              |       |
| <b>Anti-TNF-<math>\alpha</math><br/>IC rabbit IgG</b> | PE                 | Rabbit<br>F(ab') <sub>2</sub> IgG | Mouse        | Bio-Rad AbD Serotec,<br>Puchheim, Germany         | 1:50                               |       |
