# Supplementary material for: A novel direct co-culture assay analyzed by multicolor flow cytometry reveals context- and cell type-specific immunomodulatory effects of equine mesenchymal stromal cells
Source: PubMed Central journal article supplement (PMC6597077; doi:10.1371/journal.pone.0218949), 2019-06-27

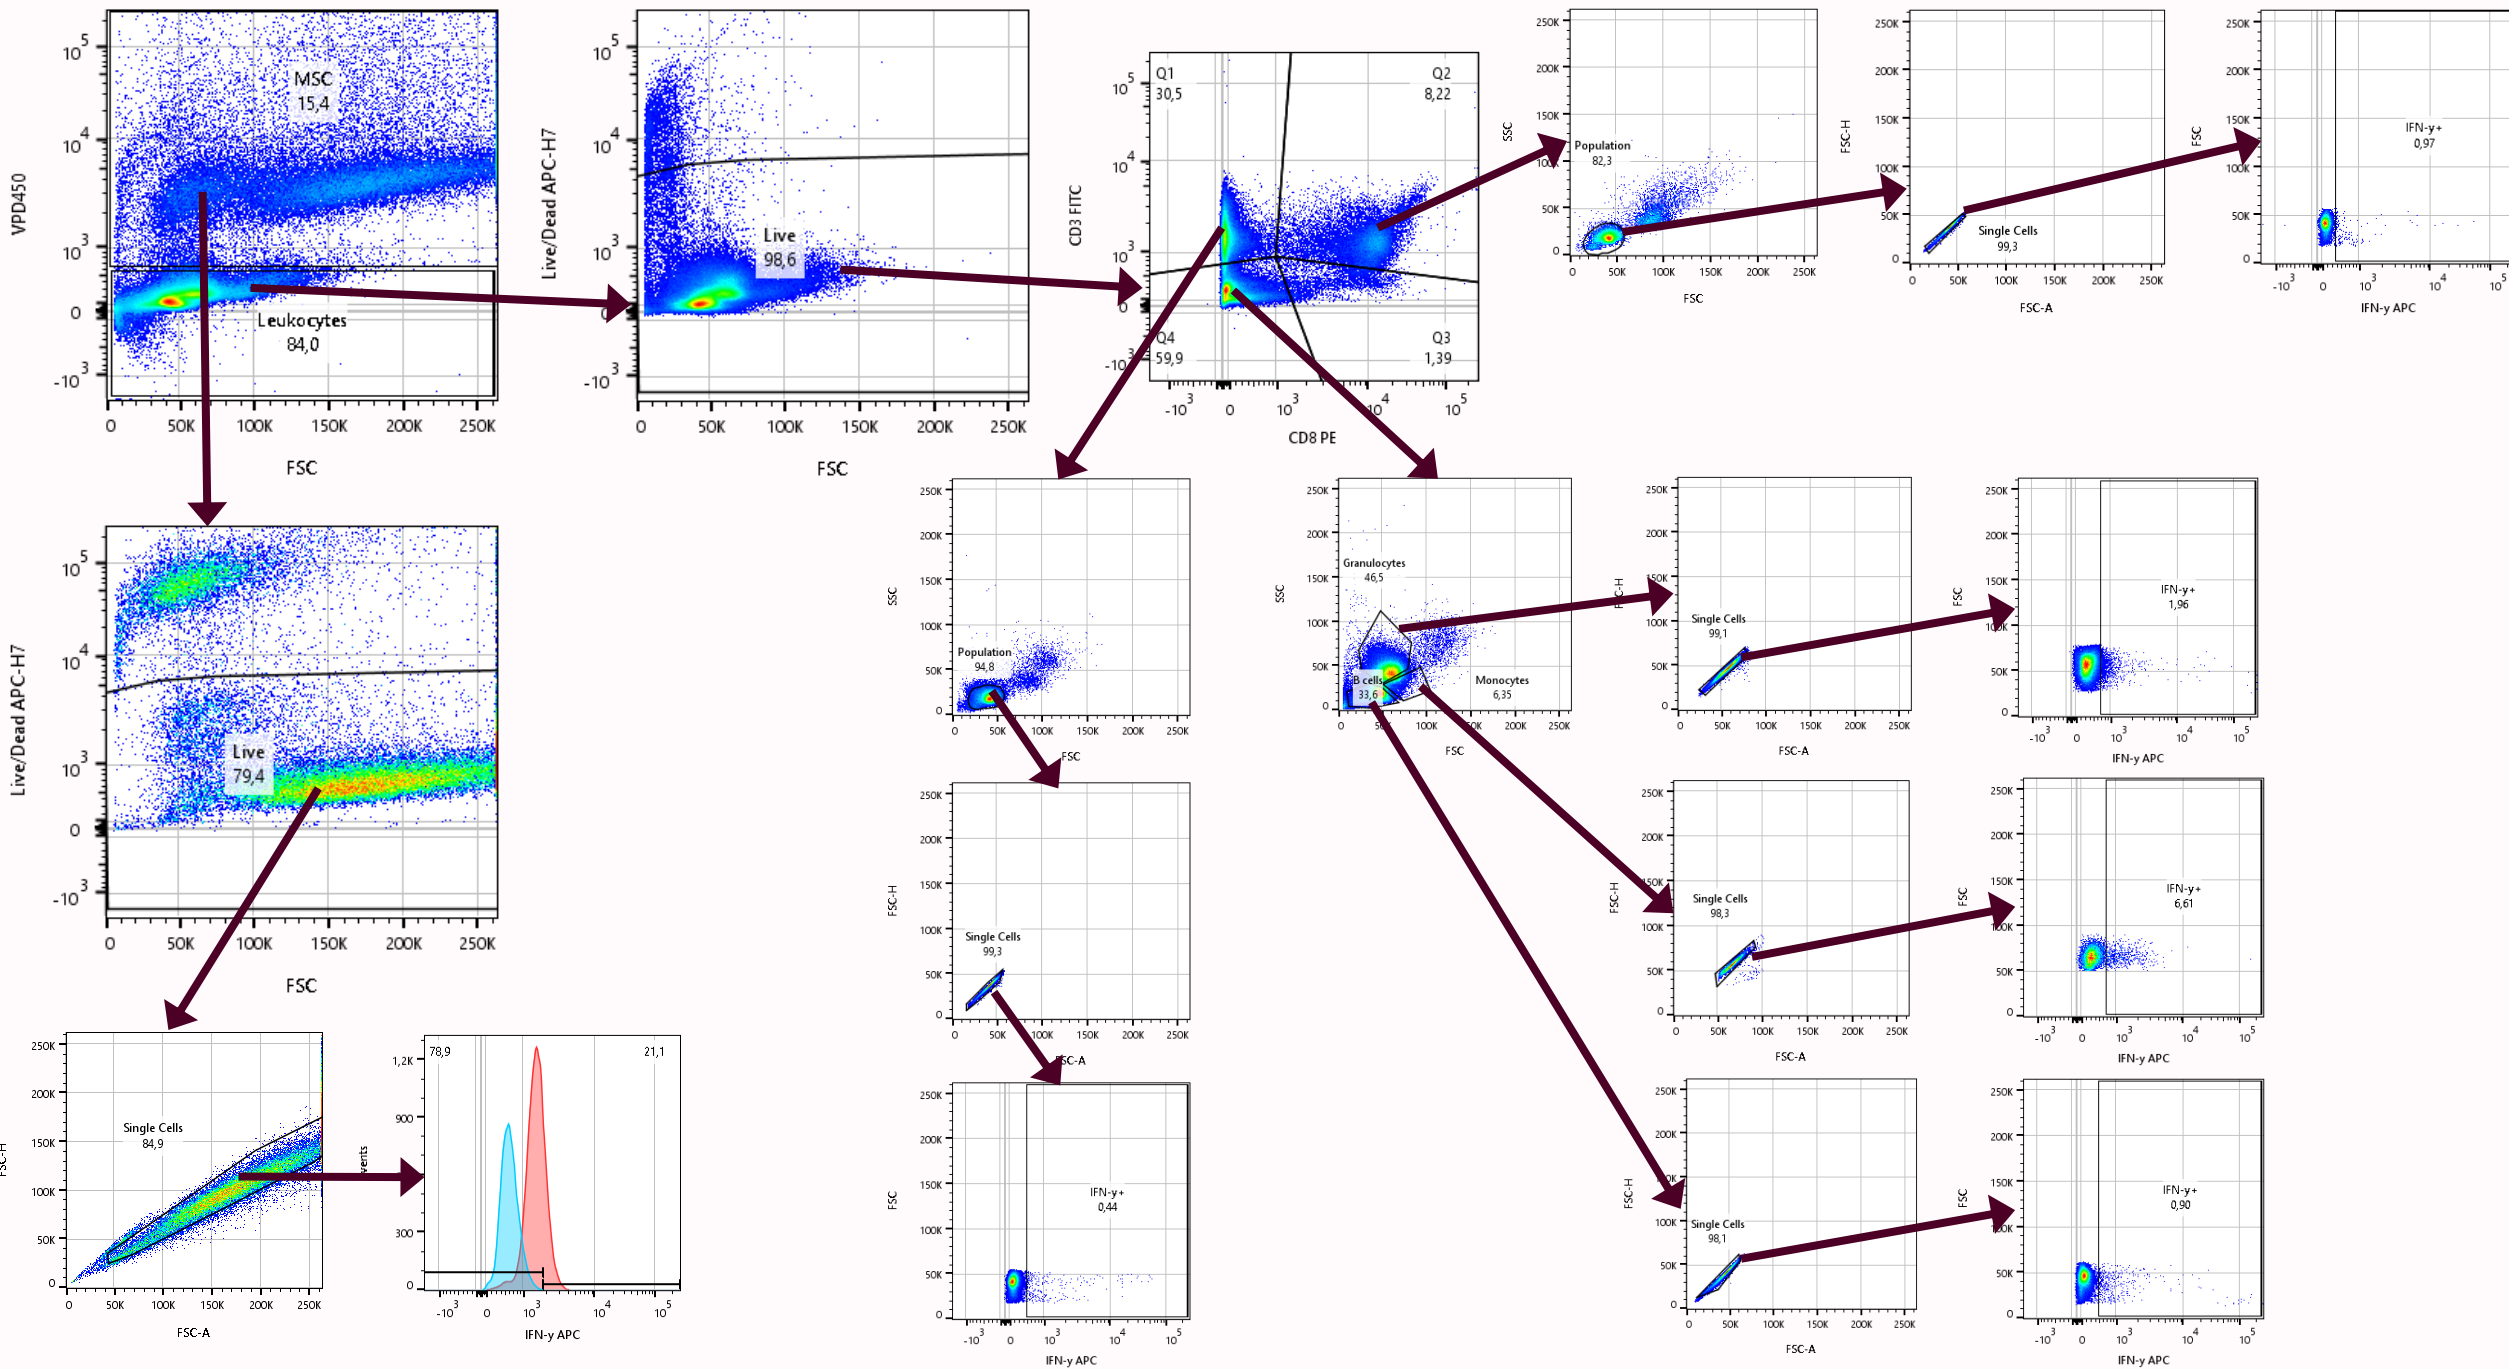

Supplement: pone.0218949.s003.pdf [file pone.0218949.s003.pdf]
